# Supplementary material
Source: PubMed Central journal article supplement (PMC4517824)
Supplement: NIHMS709646-supplement-Supplemental_figures.pdf [file NIHMS709646-supplement-Supplemental_figures.pdf]

# LNnT-BSA manuscript

Supplemental Figure

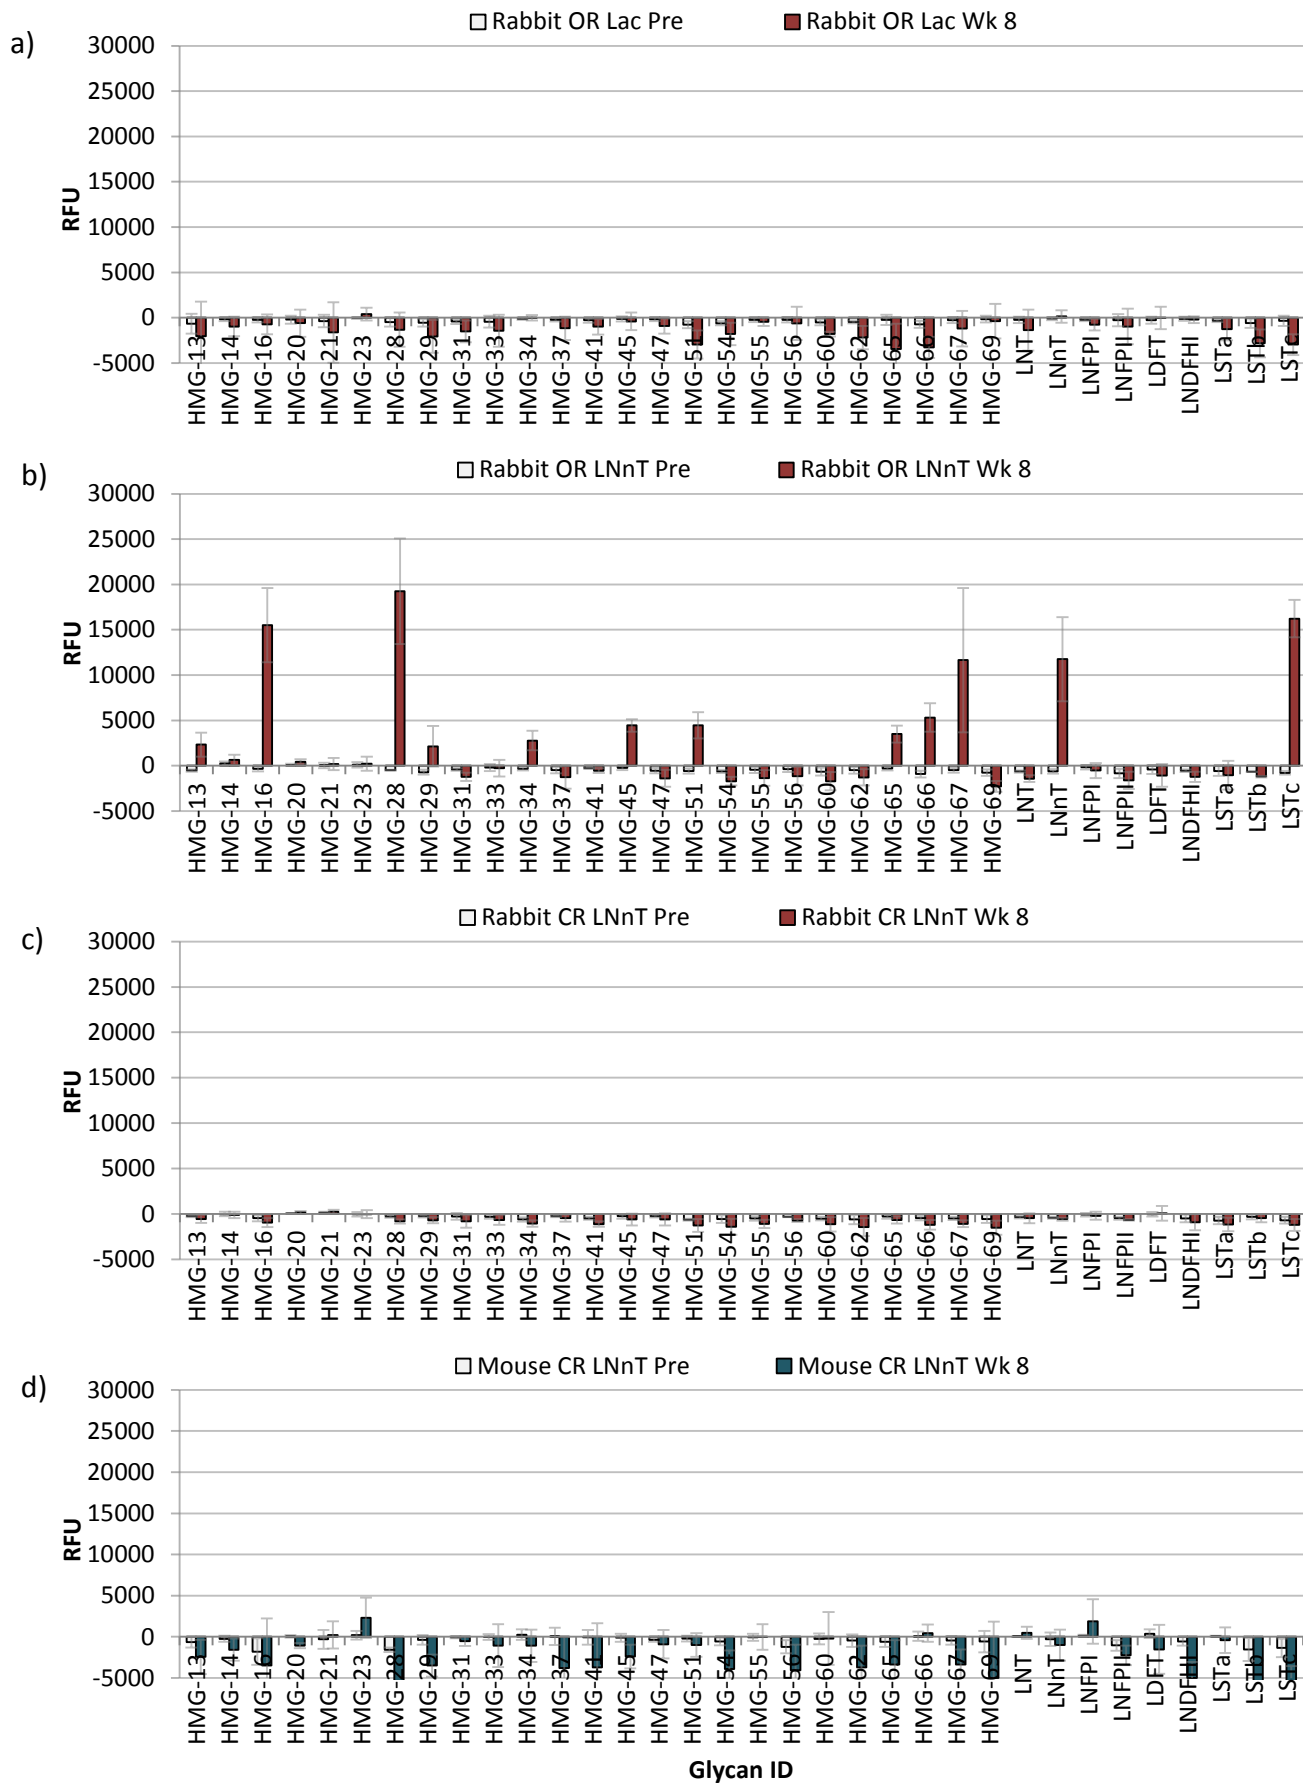

Prasanphanich *et al.* Supplemental Table

| Glycan ID             | Average RFU | Structure | Glycan ID | Average RFU | Structure |
|-----------------------|-------------|-----------|-----------|-------------|-----------|
| HMG-28                | 19268       |           | HMG-33    | -263        |           |
| LSTc                  | 16228       |           | LNFP1     | -530        |           |
| HMG-16 (LNnH)         | 15508       |           | HMG-41    | -533        |           |
| LNnT                  | 11760       |           | LSTa      | -1052       |           |
| HMG-67                | 11653       |           | LDFT      | -1067       |           |
| HMG-66                | 5328        |           | HMG-56    | -1154       |           |
| HMG-51                | 4452        |           | LSTb      | -1201       |           |
| HMG-45                | 4447        |           | HMG-31    | -1219       |           |
| HMG-65                | 3509        |           | LNDFHI    | -1222       |           |
| HMG-34                | 2785        |           | HMG-37    | -1263       |           |
| HMG-13 (para-LNH)     | 2329        |           | HMG-62    | -1273       |           |
| HMG-29 (iso-FLNH I)   | 2140        |           | HMG-55    | -1352       |           |
| HMG-14 (para-LNnH)    | 655         |           | HMG-47    | -1390       |           |
| HMG-20                | 448         |           | LNT       | -1415       |           |
| HMG-23 (iso-FLNH III) | 229         |           | LNFP2     | -1619       |           |
| HMG-21                | 191         |           | HMG-60    | -1696       |           |
|                       |             |           | HMG-54    | -1700       |           |
|                       |             |           | HMG-69    | -2276       |           |

■ Human milk glycans defined in Yu et al. (2014)

■ Control glycans

□ LNnT (or internal LNnT core)

□ LNT (or internal LNT core)

◆ Sialic Acid

● Galactose

■ GlcNAc

● Glucose

▲ Fucose

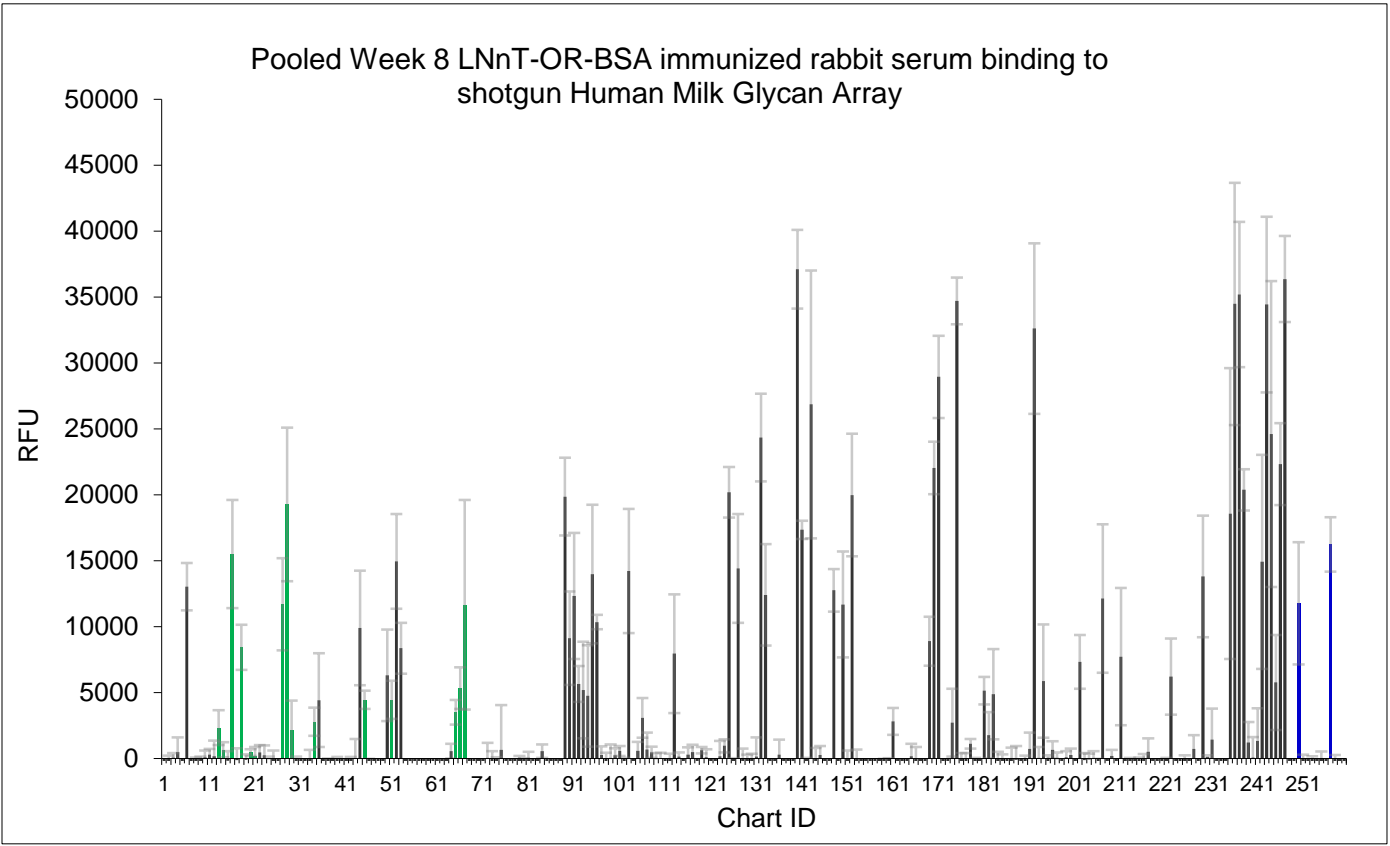

- Human milk glycans defined in Yu et al. (2014)
- Control glycans
- Undefined human milk glycans bound by rabbit LNnT-OR-BSA immune sera
